# Supplementary material for: Ablation of NPFFR2 in Mice Reduces Response to Single Prolonged Stress Model
Source: MDPI journal article supplement (doi:10.3390/cells9112479), 2020-11-14
Supplement: s1 [file s1]

## Supplementary Figures

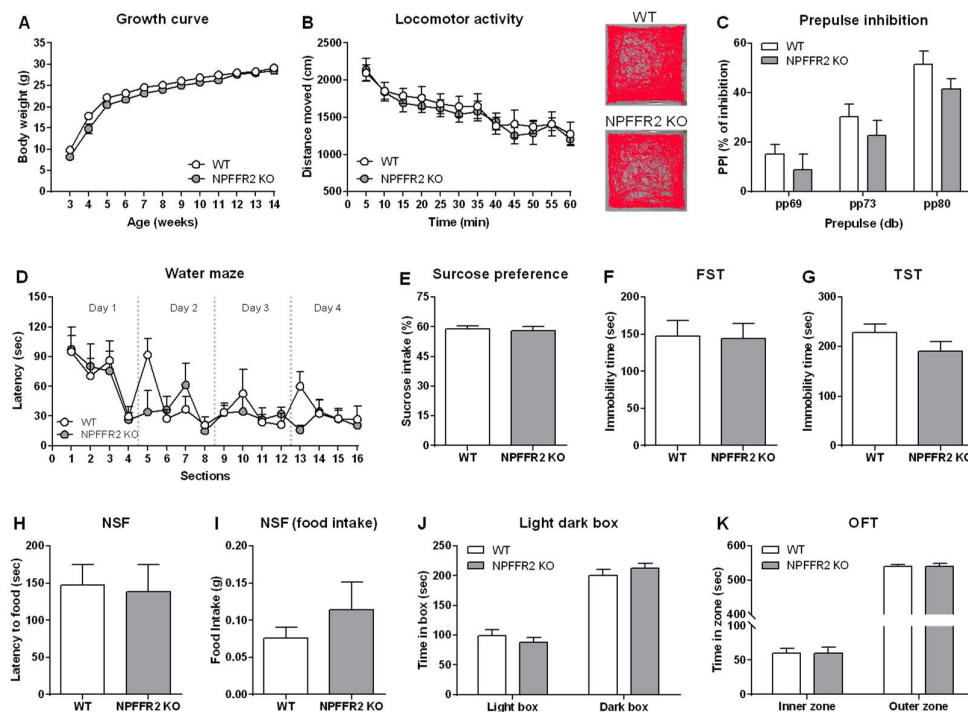

**Supplementary Figure S1.** The behavioral profiles of male NPFFR2 knockout (KO) mice. (A) Growth curves of mice from 3 weeks of age to week 14 (wild-type (WT),  $n = 11$ ; KO,  $n = 7$ ). (B) Locomotor activity within 60 min (WT,  $n = 9$ ; KO,  $n = 10$ ). (C) Sensorimotor gating was tested by prepulse inhibition (WT,  $n = 9$ ; KO,  $n = 10$ ). (D) The water maze was tested for learning (WT,  $n = 4$ ; KO,  $n = 5$ ). The depressive-like behaviors were tested by (E) sucrose preference test (WT,  $n = 9$ ; KO,  $n = 10$ ), (F) forced swimming test (FST) (WT,  $n = 9$ ; KO,  $n = 10$ ), and (G) tail suspension test (TST) (WT,  $n = 9$ ; KO,  $n = 10$ ). Anxiety-like behaviors were tested by (H and I) novelty-suppressed feeding (NSF) (WT,  $n = 9$ ; KO,  $n = 10$ ), (J) light-dark box (WT,  $n = 9$ ; KO,  $n = 10$ ), and (K) open field test (OFT) (WT,  $n = 9$ ; KO,  $n = 10$ ). Data are presented as mean  $\pm$  SEM. The data in S1E–I are analyzed by the unpaired Student's *t*-test. The data in S1A–D, S1J, S1K are analyzed by two-way ANOVA with Bonferroni's multiple comparison test.

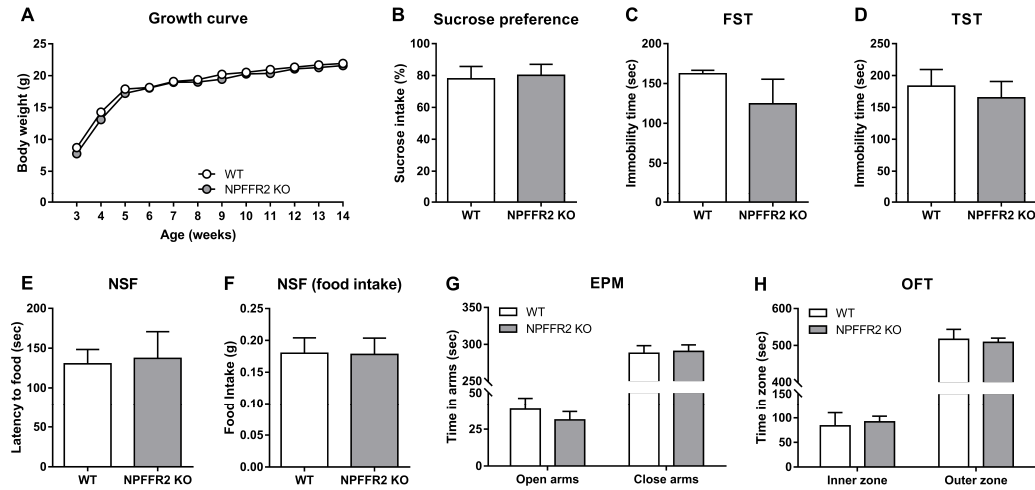

**Supplementary Figure S2.** The behavioral profiles of female NPFFR2 KO mice. **(A)** Growth curves of mice from 3 weeks of age to week 14. The depressive-like behaviors were tested by sucrose preference **(B)**, FST **(C)**, and TST **(D)**. The anxiety-like behaviors were tested by NSF **(E and F)**, Elevated plus maze (EPM) **(G)**, and OFT **(H)**. Data are presented as mean  $\pm$  SEM (WT,  $n = 5$ ; KO,  $n = 5$ ). The data in S2B–F are analyzed by the unpaired Student's *t*-test. The data in S2A, S2G, S2H are analyzed by two-way ANOVA with Bonferroni's multiple comparison test.

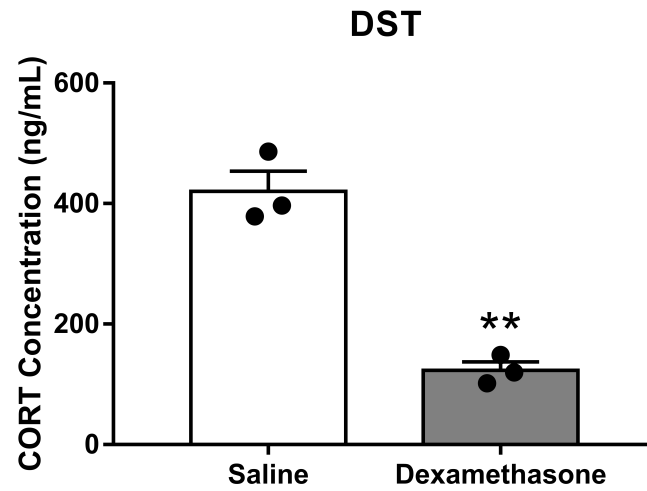

**Supplementary Figure S3.** The dexamethasone suppression test in male WT mice. A pioneer test was performed to validate the effect of dexamethasone on the reduction of circulating CORT levels. WT mice were i.p. injected with saline or 0.1 mg/kg dexamethasone 1 h before mice were physically restrained for 10 min. Facial blood was collected immediately for CORT ELISA assay. Data are presented as mean  $\pm$  SEM and are analyzed by the unpaired Student's *t*-test. \*\*  $p < 0.01$ , comparing saline to dexamethasone group ( $n = 3$  per group). The black dots indicate the individual value of WT mice.
